# Supplementary material for: Ecotin-like serine peptidase inhibitor ISP1 of Leishmania major plays a role in flagellar pocket dynamics and promastigote differentiation
Source: PubMed Central journal article supplement (PMC3440592; doi:10.1111/j.1462-5822.2012.01798.x), 2012-05-08
Supplement: cmi0014-1271-SD1.pdf [file cmi0014-1271-SD1.pdf]

# Supplementary Table 1

|                                       | A       | B       | C       | D       | E       | F       | G       |
|---------------------------------------|---------|---------|---------|---------|---------|---------|---------|
| A. WT                                 |         | P<0.001 | P<0.001 | P<0.001 | P<0.01  | P<0.001 | P<0.001 |
| B. <i>Δisp1/2/3</i>                   | P<0.001 |         | n/s     | P<0.05  | P<0.001 | P<0.001 | P<0.001 |
| C. <i>Δisp1/2/3:ISP1</i>              | P<0.001 | n/s     |         | n/s     | P<0.001 | P<0.001 | P<0.001 |
| D. <i>Δisp1/2/3:ISP2-3</i>            | P<0.001 | P<0.05  | n/s     |         | P<0.001 | P<0.001 | P<0.001 |
| E. <i>Δisp1/2/3:ISP2-3 [pXG-ISP1]</i> | P<0.001 | P<0.001 | P<0.001 | P<0.001 |         | P<0.01  | n/s     |
| F. WT [ <i>pXG-ISP1</i> ]             | P<0.001 | P<0.001 | P<0.001 | P<0.001 | P<0.01  |         | n/s     |
| G. WT [ <i>pXG-ISP2</i> ]             | P<0.001 | P<0.001 | P<0.001 | P<0.001 | n/s     | n/s     |         |

**Suppl. Table 1:** *Δisp1/2/3* parasite populations have longer flagella and are less motile than WT populations. Statistical analysis of flagella lengths of *L. major* WT (A), *Δisp1/2/3* (B), *Δisp1/2/3:ISP1* (C), *Δisp1/2/3:ISP2-3* (D), *Δisp1/2/3:ISP2-3 [pXG-ISP1]* (E), WT [*pXG-ISP1*] (F) and WT [*pXG-ISP2*] (G), as measured by one-way ANOVA with a Tukey post-test performed in GraphPad Prism 5.

# Supplementary Figure 1

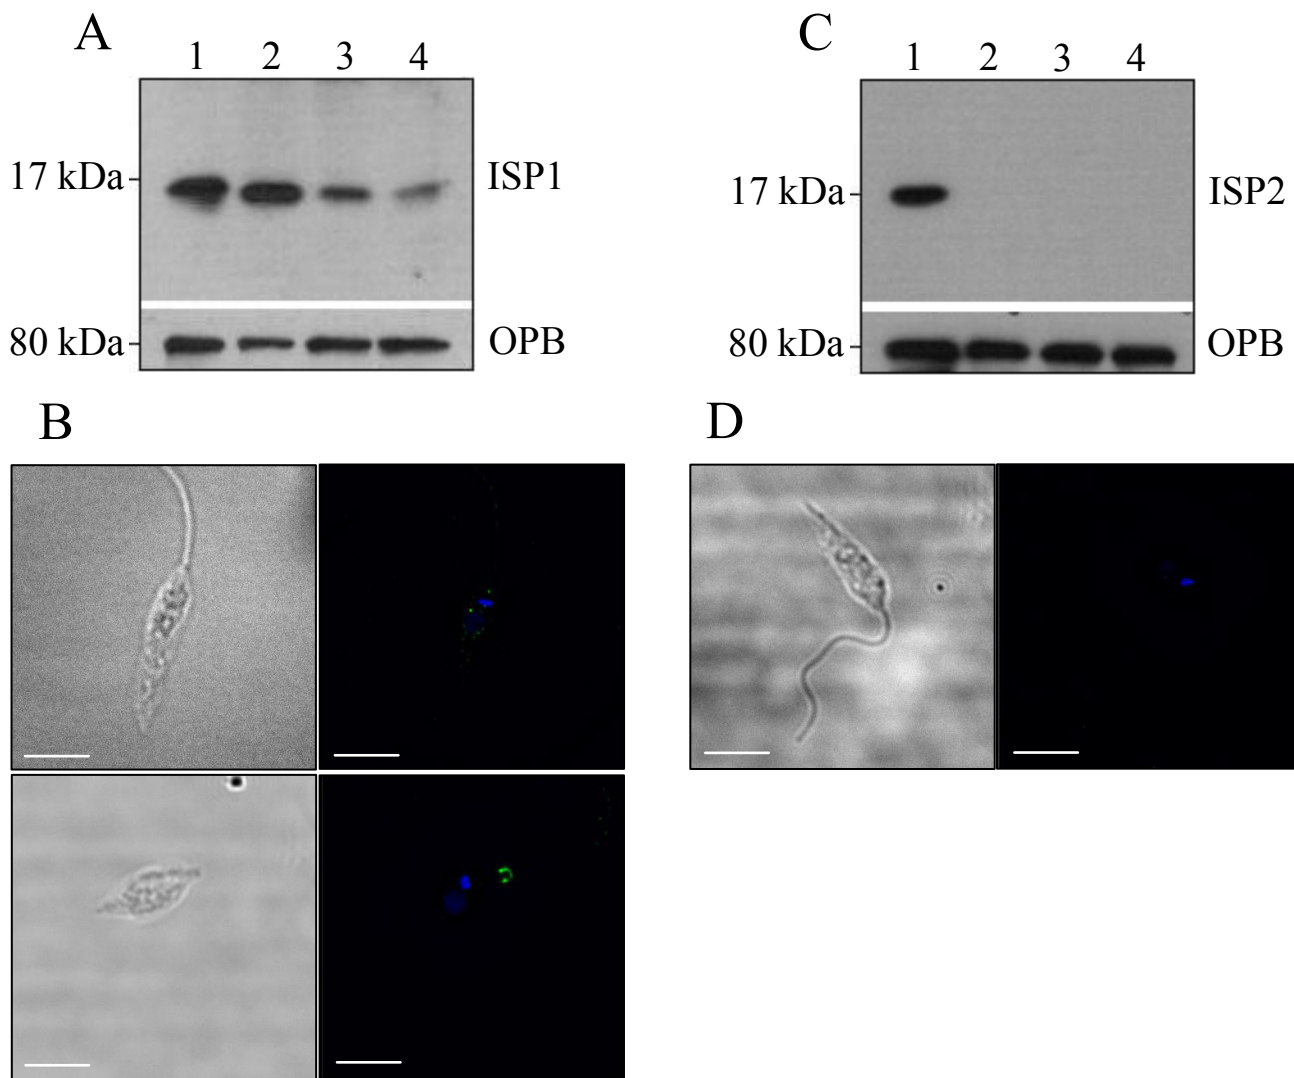

**Suppl. Figure 1:** Western blots of cell extracts from  $1 \times 10^7$  stationary phase promastigotes of WT *L. major* (Lane 1), WT *L. mexicana* (Lane 2), *L. mexicana*  $\Delta pfr1$  (Lane 3) and *L. mexicana*  $\Delta pfr2$  (lane 4), using purified anti-ISP1 (A) or anti-ISP2 (C) primary antibody raised in sheep. Antibodies to Oligopeptidase B (OPB) were used as loading control. Fixed WT *L. mexicana* were labelled with anti-ISP1 (B) or anti-ISP2 (D) primary antibody and donkey anti-sheep Alexa 488-secondary antibody. Nuclear and kinetoplast DNA were stained with DAPI. Left panel, DIC image. Right panel, merged image of ISP (green) and DAPI (blue). Scale bar = 5  $\mu\text{m}$ .
